# Supplementary material for: Four cluster-based coordination polymers built on a semirigid tripod tricarboxylate ligand
Source: Royal Society of Chemistry journal article supplement (doi:10.1039/c2ce26327k), 2012-01-01
Supplement: c2ce26327k.pdf [file c2ce26327k.pdf]

# Four Cluster-Based Coordination Polymers Built on a Semirigid Tripod Tricarboxylate Ligand

Jun Zhang,<sup>a,b</sup> Yun-Shan Xue,<sup>a</sup> Yi-Zhi Li,<sup>a</sup> Hong-Bin Du<sup>\*,a</sup> and Xiao-Zeng You<sup>a</sup>

<sup>a</sup> *State Key Laboratory of Coordination Chemistry, School of Chemistry and Chemical Engineering, Nanjing University, Nanjing, 210093, China. Fax: 86-25-83314502; Tel: 86-25-83686581; E-mail: hbdu@nju.edu.cn*

<sup>b</sup> *School of Materials and Chemical Engineering, Anhui University of Architecture, Hefei, 230601, China.*

## Table of Content

Fig. S1. X-ray powder diffraction patterns of **1-4**.

Fig. S2. ORTEP drawings of the asymmetric units of **2-4**

Table. S1. Selected bond lengths (Å) and angles (deg) for **2** and **3**.

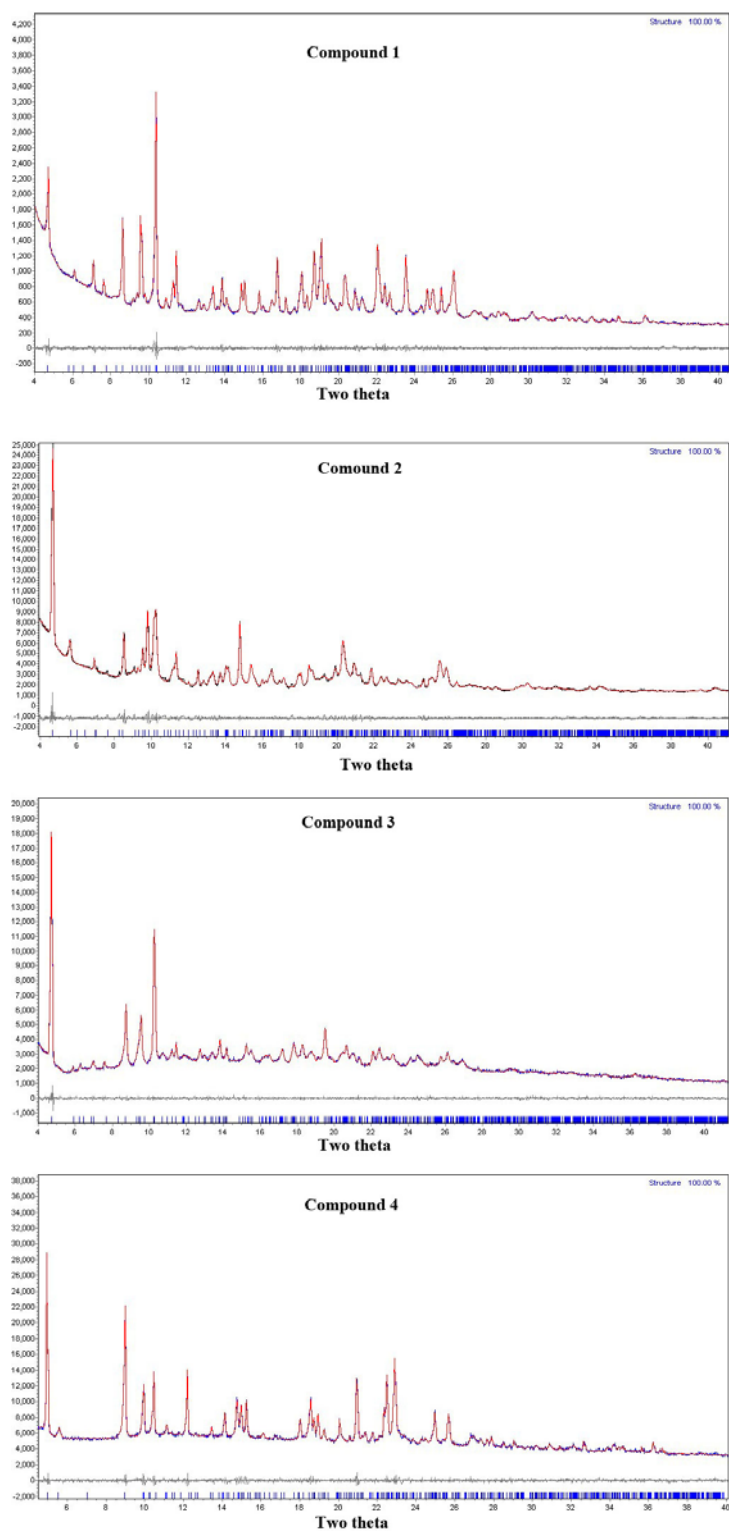

**Fig. S1.** X-ray powder diffraction patterns of **1-4**: the red line is the best fitted, the blue line is as-synthesized and the gray line is the difference. The best fitting results for **1**:  $a = 14.644$  (3),  $b = 17.519$  (9),  $c = 20.557$  (6) Å,  $\alpha = 66.78$  (2),  $\beta = 77.97$  (3),  $\gamma = 68.06$  (2)°; for **2**:  $a = 14.89$  (2),  $b = 17.94$  (2),  $c = 20.63$  (2) Å,  $\alpha = 67.35$  (9),  $\beta = 77.62$  (10),  $\gamma = 67.75$  (9) °; for **3**:  $a = 15.116$  (5),  $b = 17.425$  (5),  $c = 20.426$  (8) Å,  $\alpha = 67.05$  (2),  $\beta = 76.33$  (2),  $\gamma = 65.09$  (2) °; for **4**:  $a = 8.600$  (3),  $b = 35.52$  (2),  $c = 17.857$  (8) Å,  $\beta = 92.37$  (4) °.

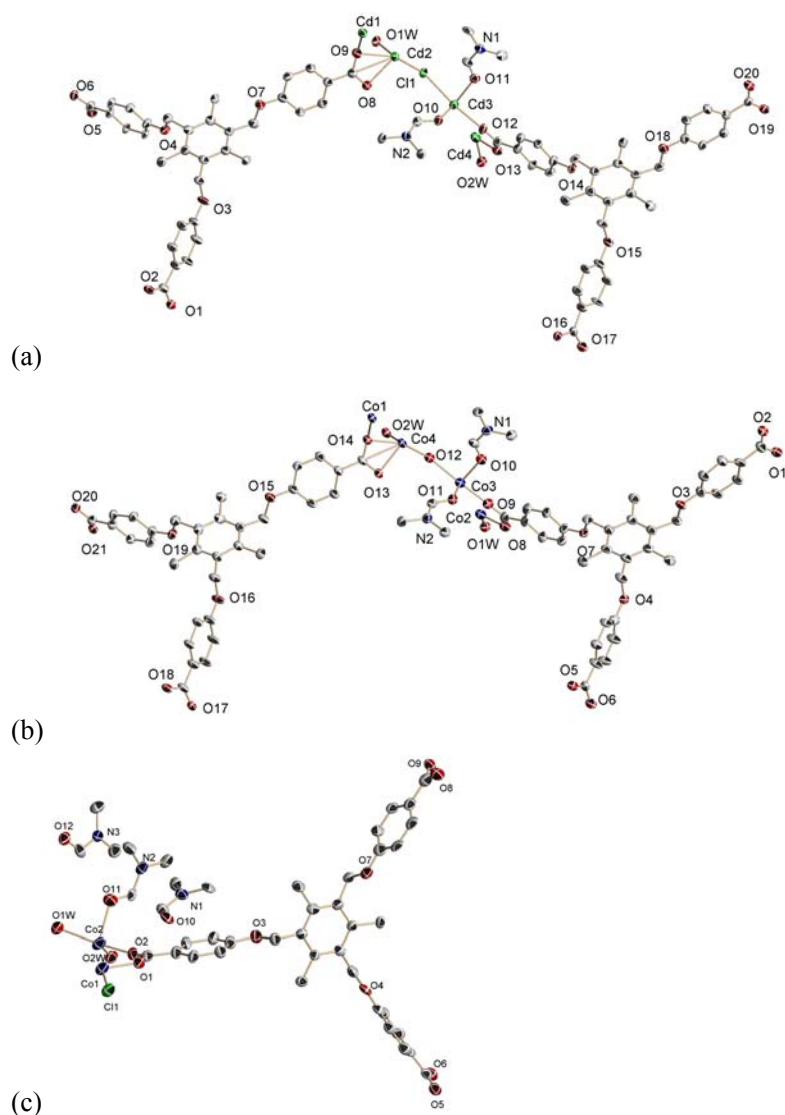

**Fig. S2.** ORTEP drawings of the asymmetric units of **2** (a), **3** (b) and **4** (c), respectively, at the 50% probability. The H atoms and guest water molecules are omitted for clarity.

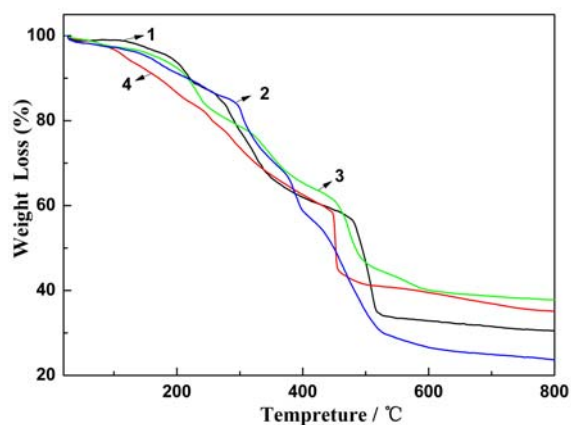

**Fig. S3** TGA profiles under nitrogen for compounds **1** – **4**.

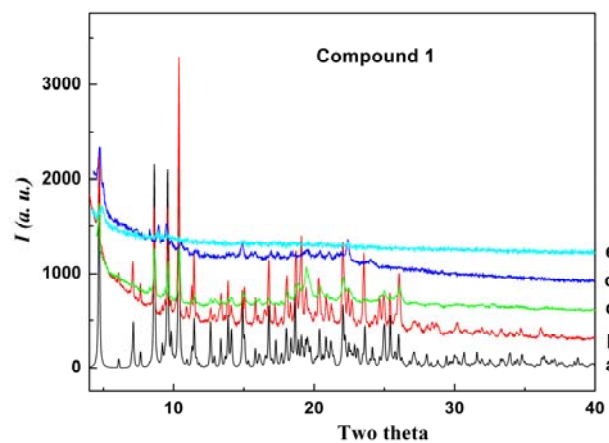

**Fig. S4** XRPD patterns of **1**: (a) calculated, (b) as-synthesized and heated at (c)120 °C, (d) 200 °C and (e) 240 °C for *ca.* 0.5 h, respectively.

**Table. S1.** Selected bond lengths (Å) and angles (deg) for **2** and **3**.

|                                           |           |                                         |           |                                           |           |                                            |           |
|-------------------------------------------|-----------|-----------------------------------------|-----------|-------------------------------------------|-----------|--------------------------------------------|-----------|
| <b>2</b>                                  |           |                                         |           |                                           |           |                                            |           |
| Cd1—O2 <sup>i</sup>                       | 2.283(2)  | Cd2—O5 <sup>iii</sup>                   | 2.176(2)  | Cd3—O11                                   | 2.267(2)  | Cd4—O2W                                    | 2.247(2)  |
| Cd1—O6 <sup>iii</sup>                     | 2.269(2)  | Cd2—O8                                  | 2.337(2)  | Cd3—O12                                   | 2.210(2)  | Cd4—O13                                    | 2.165(2)  |
| Cd1—O9                                    | 2.298(2)  | Cd2—O9                                  | 2.390(2)  | Cd3—O16 <sup>vii</sup>                    | 2.321(2)  | Cd4—O16 <sup>vii</sup>                     | 2.321(2)  |
| Cd2—O1 <sup>ii</sup>                      | 2.162(2)  | Cd2—Cl1                                 | 2.531(1)  | Cd3—O20 <sup>vi</sup>                     | 2.265(2)  | Cd4—O17 <sup>vii</sup>                     | 2.214(2)  |
| Cd2—O1W                                   | 2.389(2)  | Cd3—O10                                 | 2.286(2)  | Cd3—Cl1                                   | 2.581(1)  | Cd4—O19 <sup>vi</sup>                      | 2.128(2)  |
| O2 <sup>i</sup> —Cd1—O2 <sup>ii</sup>     | 180.      | O5 <sup>iii</sup> —Cd2—O9               | 99.94(8)  | O12—Cd3—O10                               | 86.61(8)  | O2W—Cd4—O16 <sup>vii</sup>                 | 149.13(8) |
| O2 <sup>i</sup> —Cd1—O6 <sup>iii</sup>    | 89.99(8)  | O8—Cd2—O1W                              | 85.40(8)  | O12—Cd3—O11                               | 87.55(9)  | O13—Cd4—O2W                                | 104.46(8) |
| O2 <sup>i</sup> —Cd1—O9                   | 89.79(8)  | O8—Cd2—O9                               | 55.60(8)  | O12—Cd3—O16 <sup>vii</sup>                | 86.48(8)  | O13—Cd4—O16 <sup>vii</sup>                 | 98.68(7)  |
| O6 <sup>iii</sup> —Cd1—O6 <sup>iv</sup>   | 180       | O9—Cd2—O1W                              | 82.53(8)  | O12—Cd3—O20 <sup>vi</sup>                 | 100.29(9) | O13—Cd4—O17 <sup>vii</sup>                 | 98.37(9)  |
| O6 <sup>iv</sup> —Cd1—O9                  | 87.48(8)  | O1 <sup>ii</sup> —Cd2—Cl1               | 101.88(6) | O20 <sup>vi</sup> —Cd3—O16 <sup>vii</sup> | 92.87(8)  | O17 <sup>vii</sup> —Cd4—O2W                | 105.86(9) |
| O9—Cd1—O9 <sup>v</sup>                    | 180       | O1W—Cd2—Cl1                             | 84.66(6)  | O20 <sup>vi</sup> —Cd3—O11                | 170.20(9) | O17 <sup>vii</sup> —Cd4—O16 <sup>vii</sup> | 49.94(8)  |
| O1 <sup>ii</sup> —Cd2—O1W                 | 80.39(8)  | O5 <sup>iii</sup> —Cd2—Cl1              | 93.62(6)  | O20 <sup>vi</sup> —Cd3—O10                | 81.42(8)  | O19 <sup>vi</sup> —Cd4—O2W                 | 92.35(9)  |
| O1 <sup>ii</sup> —Cd2—O5 <sup>iii</sup>   | 97.83(8)  | O8—Cd2—Cl1                              | 99.70(6)  | O10—Cd3—Cl1                               | 96.72(6)  | O19 <sup>vi</sup> —Cd4—O16 <sup>vii</sup>  | 102.14(8) |
| O1 <sup>ii</sup> —Cd2—O8                  | 152.82(8) | O9—Cd2—Cl1                              | 152.91(6) | O11—Cd3—Cl1                               | 86.60(6)  | O19 <sup>vi</sup> —Cd4—O13                 | 103.02(8) |
| O1 <sup>ii</sup> —Cd2—O9                  | 99.37(8)  | O10—Cd3—O16 <sup>vii</sup>              | 170.11(8) | O12—Cd3—Cl1                               | 173.42(6) | O19 <sup>vi</sup> —Cd4—O17 <sup>vii</sup>  | 147.40(9) |
| O5 <sup>iii</sup> —Cd2—O1W                | 177.19(8) | O11—Cd3—O10                             | 93.29(8)  | O16 <sup>vii</sup> —Cd3—Cl1               | 90.88(5)  |                                            |           |
| O5 <sup>iii</sup> —Cd2—O8                 | 97.09(8)  | O11—Cd3—O16 <sup>vii</sup>              | 93.48(8)  | O20 <sup>vi</sup> —Cd3—Cl1                | 85.84(6)  |                                            |           |
| <b>3</b>                                  |           |                                         |           |                                           |           |                                            |           |
| Co1—O14                                   | 2.175(2)  | Co2—O6 <sup>vii</sup>                   | 1.921(2)  | Co3—O10                                   | 2.098(2)  | Co4—O13                                    | 2.153(1)  |
| Co1—O18 <sup>i</sup>                      | 2.056(2)  | Co2—O8                                  | 1.934(2)  | Co3—O11                                   | 2.060(2)  | Co4—O14                                    | 2.146(2)  |
| Co1—O20 <sup>iii</sup>                    | 2.064(2)  | Co3—O2 <sup>vi</sup>                    | 2.035(2)  | Co3—O1W                                   | 2.270(2)  | Co4—O17 <sup>ii</sup>                      | 1.979(1)  |
| Co2—O1 <sup>vi</sup>                      | 1.914(2)  | Co3—O5 <sup>vii</sup>                   | 1.996(1)  | Co4—O2W                                   | 2.015(2)  | Co4—O21 <sup>iii</sup>                     | 1.997(2)  |
| Co2—O12                                   | 2.006(2)  | Co3—O9                                  | 1.989(2)  | Co4—O1W                                   | 2.247(2)  |                                            |           |
| O14—Co1—O14 <sup>v</sup>                  | 180       | O8—Co2—O1W                              | 110.67(7) | O9—Co3—O11                                | 90.92(6)  | O17 <sup>ii</sup> —Co4—O2W                 | 85.28(6)  |
| O18 <sup>i</sup> —Co1—O18 <sup>ii</sup>   | 180       | O2 <sup>vi</sup> —Co3—O10               | 170.28(6) | O9—Co3—O12                                | 177.34(6) | O17 <sup>ii</sup> —Co4—O12                 | 95.76(6)  |
| O18 <sup>i</sup> —Co1—O20 <sup>iii</sup>  | 88.40(6)  | O2 <sup>vi</sup> —Co3—O11               | 86.47(6)  | O10—Co3—O12                               | 88.02(6)  | O17 <sup>ii</sup> —Co4—O13                 | 163.18(6) |
| O18 <sup>ii</sup> —Co1—O14                | 88.67(6)  | O2 <sup>vi</sup> —Co3—O12               | 84.95(6)  | O11—Co3—O10                               | 86.71(6)  | O17 <sup>ii</sup> —Co4—O14                 | 104.00(6) |
| O20 <sup>iv</sup> —Co1—O14                | 94.37(6)  | O5 <sup>vii</sup> —Co3—O2 <sup>vi</sup> | 98.36(6)  | O11—Co3—O12                               | 89.09(6)  | O17 <sup>ii</sup> —Co4—O21 <sup>iii</sup>  | 96.01(6)  |
| O20 <sup>iii</sup> —Co1—O20 <sup>iv</sup> | 180       | O5 <sup>vii</sup> —Co3—O10              | 88.19(6)  | O2W—Co4—O12                               | 83.47(6)  | O21 <sup>iii</sup> —Co4—O2W                | 173.85(6) |
| O1 <sup>vi</sup> —Co2—O1W                 | 100.05(7) | O5 <sup>vii</sup> —Co3—O11              | 174.60(6) | O2W—Co4—O13                               | 86.01(5)  | O21 <sup>iii</sup> —Co4—O12                | 90.41(6)  |
| O1 <sup>vi</sup> —Co2—O6 <sup>vii</sup>   | 121.89(7) | O5 <sup>vii</sup> —Co3—O12              | 88.92(6)  | O2W—Co4—O14                               | 84.16(6)  | O21 <sup>iii</sup> —Co4—O13                | 94.18(5)  |
| O1 <sup>vi</sup> —Co2—O8                  | 115.25(7) | O9—Co3—O2 <sup>vi</sup>                 | 97.70(6)  | O13—Co4—O12                               | 97.51(6)  | O21 <sup>iii</sup> —Co4—O14                | 101.31(6) |
| O6 <sup>vii</sup> —Co2—O1W                | 95.54(7)  | O9—Co3—O5 <sup>vii</sup>                | 90.84(6)  | O14—Co4—O12                               | 155.68(5) |                                            |           |
| O6 <sup>vii</sup> —Co2—O8                 | 110.35(7) | O9—Co3—O10                              | 89.32(6)  | O14—Co4—O13                               | 60.75(5)  |                                            |           |

Symmetry transformations: for **2**: (i) 2-x, 2-y, -z; (ii) x, -1+y, 1+z; (iii) x, y, 1+z; (iv) 2-x, 1-y, -z; (v) 2-x, 1-y, 1-z; (vi) x, y, -1+z; (vii) x, -1+y, z; (viii) x, 1+y, -1+z; (ix) x, 1+y, z; for **3**: (i) 2-x, 2-y, -z; (ii) x, -1+y, 1+z; (iii) x, y, 1+z; (iv) 2-x, 1-y, -z; (v) 2-x, 1-y, 1-z; (vi) x, y, -1+z; (vii) x, -1+y, z; (viii) x, 1+y, z; (ix) x, 1+y, -1
